# Supplementary material
Source: PubMed Central journal article supplement (PMC2829365)
Supplement: NIHMS162385-supplement-Supp_Matt.pdf [file NIHMS162385-supplement-Supp_Matt.pdf]

A

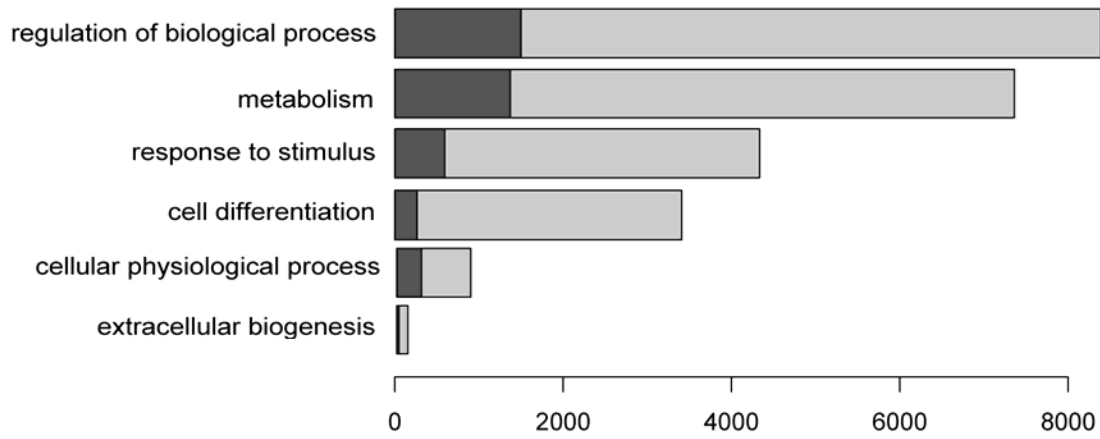

B

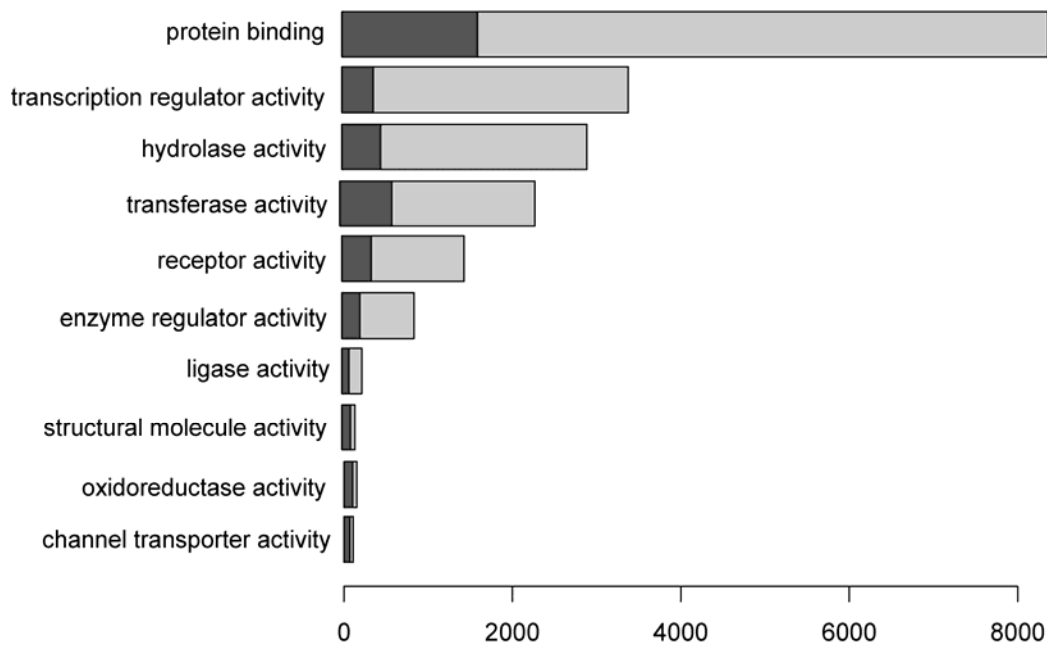

**Supp. Figure S1.** Biological processes and molecular functions of the cancer-related proteins. The bar charts depict biological processes (A) and molecular functions (B) with 100 or more cancer-related variations (crVARs). Grey bars represent the total numbers of crVARs, while dark grey bars represent the numbers of human proteins bearing the variations.

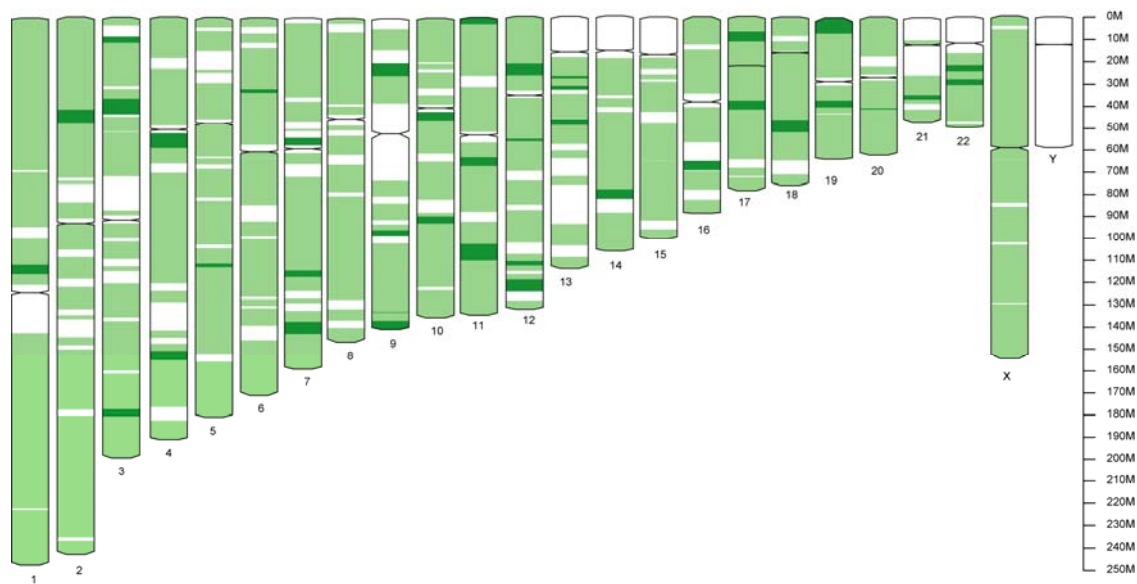

**Supp. Figure S2.** Distribution of cancer-related variations on human chromosomes. Cytogenetic bands are colored in different colors based on the density of the cancer-related variations (crVARs). White bands indicate the absence of cancer-related variations (crVARs), while green bands indicate the existence of crVARs. Cytogenetic bands with high density of crVARs (3 fold increase compared to the average in the human genome) are colored in dark green.
